# Supplementary material for: Altered Circulating Immune Cell Distribution in Traumatic Spinal Cord Injury Patients in Relation to Clinical Parameters
Source: PubMed Central journal article supplement (PMC9273975; doi:10.3389/fimmu.2022.873315), 2022-06-28
Supplement: DataSheet_1.pdf [file DataSheet_1.pdf]

*Supplementary Material*

**Altered circulating immune cell distribution in traumatic spinal cord injury patients in relation to clinical parameters**

**Judith Fraussen, Lien Beckers, Charlotte C.M. van Laake-Geelen, Bart Depreitere, Jens Deckers, Erwin M.J. Cornips, Dieter Peuskens, Veerle Somers**

**Supplementary Table 1. Detailed information on SCI patients**

| Subject | Age | Gender | AIS score |                   | Location injury | Aetiology              | Surgery                              | Included time points |
|---------|-----|--------|-----------|-------------------|-----------------|------------------------|--------------------------------------|----------------------|
|         |     |        | t0        | Later time points |                 |                        |                                      |                      |
| SCI-01  | 61  | M      | C         | C at 3m           | Cervical        | Fall                   | Laminectomy                          | t3                   |
| SCI-02  | 56  | M      | C         | C at 3w           | Thoracic        | Motor vehicle accident | Fixation (2x)                        | t3, t4               |
| SCI-03  | 64  | F      | B         | n.a.              | Cervical        | Fall                   | ACDF                                 | t0                   |
| SCI-04  | 56  | M      | D         | E at 1d           | Cervical        | Fall                   | Laminectomy                          | t0, t1, t2, t3, t4   |
| SCI-05  | 64  | M      | A         | A at 7m           | Thoracic        | Fall                   | Fixation                             | t0, t1               |
| SCI-06  | 48  | M      | B         | n.a.              | Cervical        | Motor vehicle accident | Halo-gravity traction, spondylodesis | t0, t1, t2           |
| SCI-07  | 58  | F      | A         | A at 4m           | Thoracic        | Fall                   | Fixation                             | t2                   |
| SCI-08  | 62  | M      | A         | C at 12w          | Cervical        | Fall                   | Luxation, fusion, laminectomy        | t0, t1, t2, t3       |
| SCI-09  | 73  | M      | A         | n.a.              | Thoracic        | Fall                   | Spondylodesis                        | t0                   |
| SCI-10  | 48  | M      | D         | D at 3m           | Cervical        | Motor vehicle accident | Spondylodesis, ACDF                  | t2                   |
| SCI-11  | 58  | M      | A         | A at 9m           | Lumbar          | Fall                   | Spondylodesis                        | t5                   |
| SCI-12  | 18  | M      | B         | B at 12m          | Cervical        | Sports accident        | Fixation, spondylodesis              | t2, t3, t4, t5       |
| SCI-13  | 67  | M      | D         | D at 6m           | Cervical        | Fall                   | /                                    | t1, t2, t4           |
| SCI-14  | 61  | M      | D         | D at 6m           | Cervical        | Fall                   | Laminectomy, spondylodesis           | t3, t4, t5           |
| SCI-15  | 68  | M      | D         | E at 5d           | Cervical        | Sports accident        | Fusion, laminectomy                  | t0, t1, t2, t3, t4   |
| SCI-16  | 28  | M      | A         | A at 4m           | Thoracic        | Gunshot                | Laminectomy                          | t0, t1, t2, t3       |
| SCI-17  | 54  | M      | C         | D at 15m          | Cervical        | Sports accident        | ACIF decompression                   | t0, t1, t3           |
| SCI-18  | 60  | M      | D         | E at 24m          | Cervical        | Fall                   | Fusion                               | t3, t4               |

Abbreviations: ACDF, anterior cervical discectomy and fusion; ACIF, anterior cervical interbody fusion; F, female; M, male; n.a. not available; d, days; m, months; w, weeks

**Supplementary Table 2. Monoclonal antibodies used for flow cytometry**

| <b>Marker</b>               | <b>Fluorochrome</b> | <b>Clone</b> | <b>Company</b>  |
|-----------------------------|---------------------|--------------|-----------------|
| CD19                        | BV421               | HIB19        | BioLegend       |
| CD24                        | BV605               | ML5          | BioLegend       |
| CD27                        | APC                 | M-T271       | BioLegend       |
| CD38                        | BV711               | HIT2         | BioLegend       |
| CD74                        | PE                  | LN2          | BioLegend       |
| CD267                       | PE-Dazzle594        | 1A1          | BioLegend       |
| CD268                       | APC-Cy7             | 11C1         | BioLegend       |
| CD269                       | PerCP-Cy5.5         | 19F2         | BioLegend       |
| IgD                         | PE-Cy7              | IA6-2        | BioLegend       |
| IgM                         | BV650               | MHM-88       | BioLegend       |
| IgG                         | AF700               | G18-145      | BD Biosciences  |
| IgA                         | FITC                | IS11-8E10    | Miltenyi Biotec |
| Fixable viability dye (FVD) | eFluor506           | /            | eBioscience     |

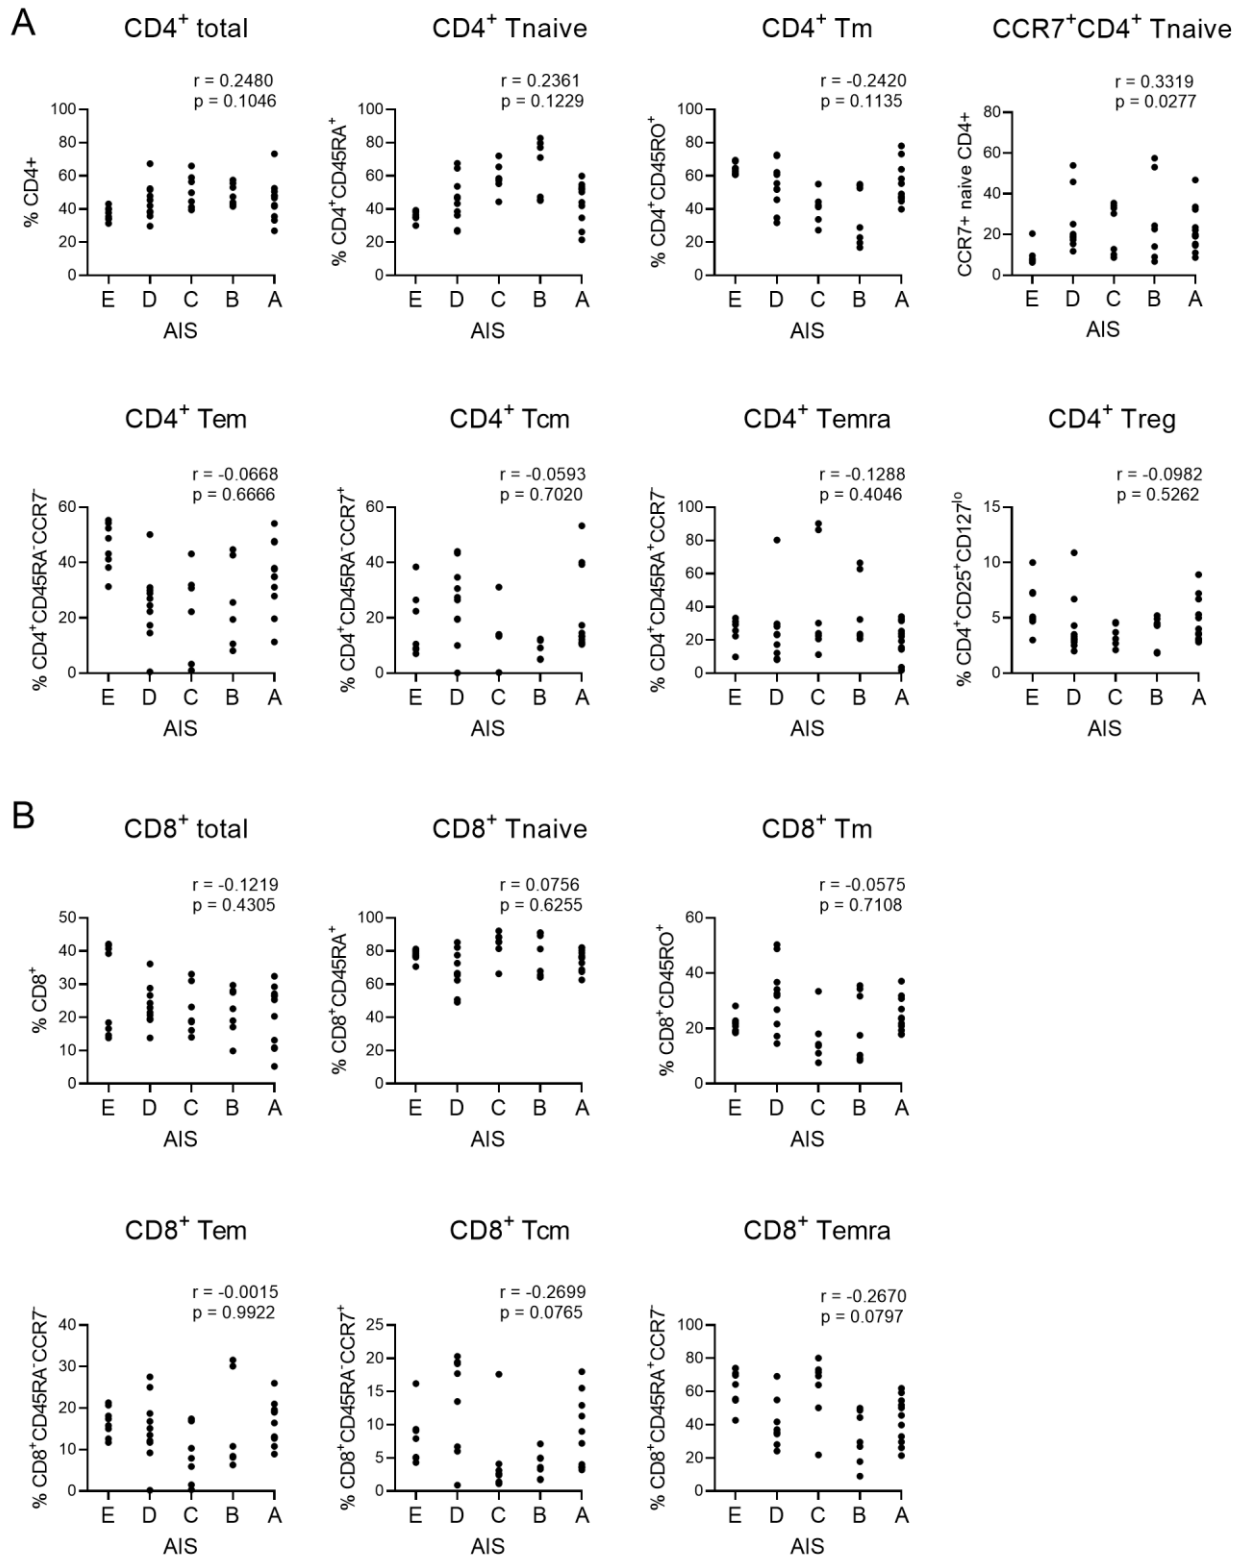

**Supplementary Figure 1. Correlations of T cell subsets and disease severity.** Correlation of the percentages of CD4<sup>+</sup> (A) and CD8<sup>+</sup> (B) total, Tnaive, Tm, Tem, Tcm, Temra and Treg with AIS score at sampling timepoint.  $r$  denotes the Spearman correlation coefficient (rho).

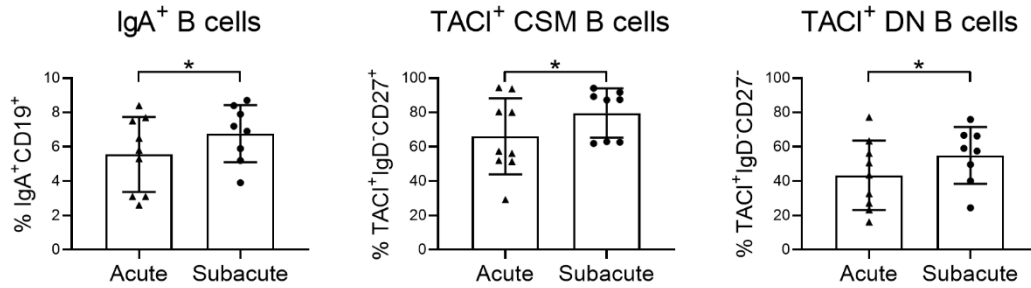

**Supplementary Figure 2. Frequency of specific B cell subsets in the peripheral blood of acute and subacute SCI patients.** Percentages of IgA<sup>+</sup> total B cells, TACI<sup>+</sup> CSM B cells and TACI<sup>+</sup> DN B cells are shown within the B cell population of acute SCI patients (n = 9) and subacute SCI patients (n = 8). Mean (bars) ± SD is depicted. \* p < 0.05

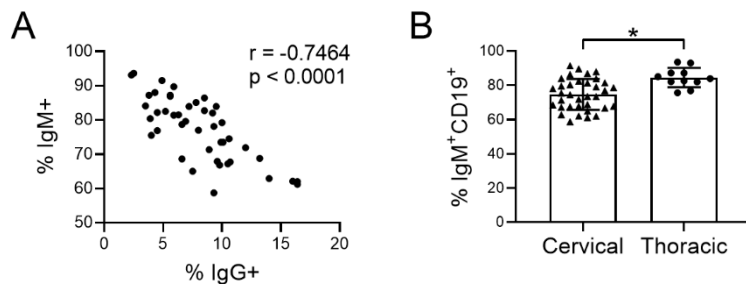

**Supplementary Figure 3. IgM<sup>+</sup> B cells in correlation with IgG<sup>+</sup> B cells and in cervical and thoracic SCI patients.** (A) Correlation of IgM<sup>+</sup> B cell percentages and IgG<sup>+</sup> B cell percentages. r denotes the Spearman correlation coefficient (rho). (B) Percentages of IgM<sup>+</sup> total B cells are shown within the B cell population of SCI patients with a cervical (n = 12) or thoracic (n = 6) injury, including 35 cervical and 11 thoracic samples collected at different (s)aSCI and cSCI time points. Mean (bars) ± SD is depicted. \* p < 0.05
